# Supplementary material for: The development of theta and alpha neural oscillations from ages 3 to 24 years
Source: PubMed Central journal article supplement — Dev Cogn Neurosci. 2021 May 31;50:100969. doi: 10.1016/j.dcn.2021.100969 (PMC8249779; doi:10.1016/j.dcn.2021.100969), 2021-05-31
Supplement: mmc1.pdf [file mmc1.pdf]

## Supplemental Figures

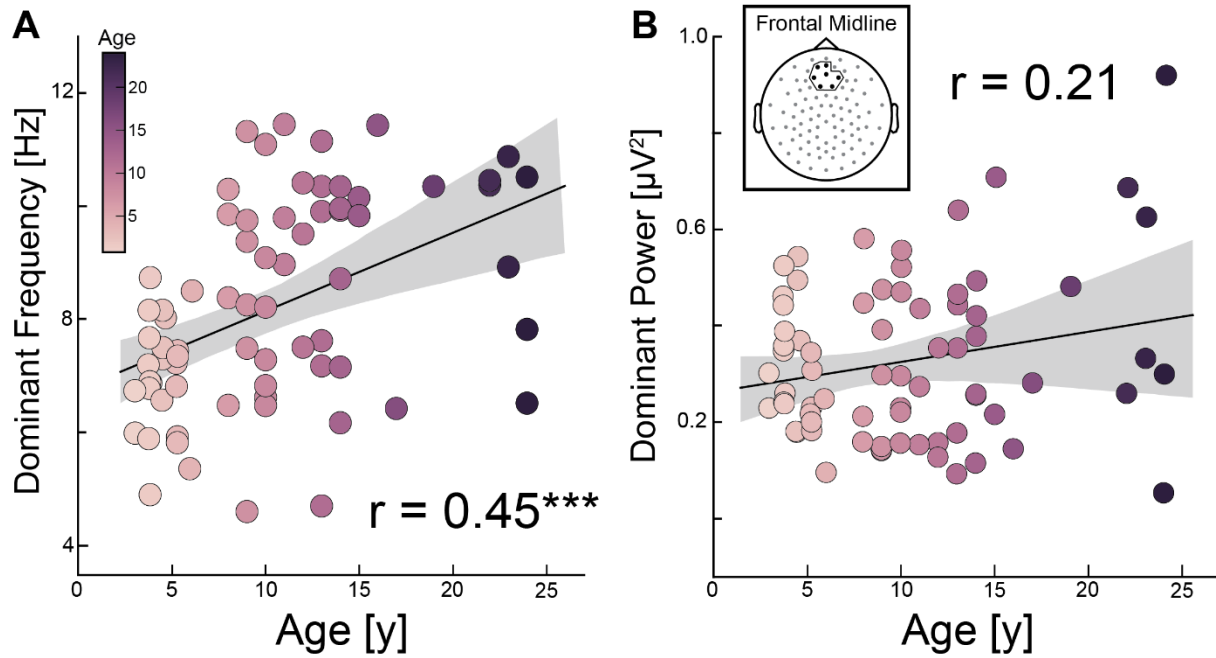

**Figure S1.** The frequency and power of the dominant oscillation increases with age Same as Figure 3, but for the frontal-midline electrode cluster. The peak frequency (A) but not peak power (B) findings were significantly correlated with age. \*\*\*  $p < 0.0001$ ; Grey area is 95% confidence interval.
